# Supplementary material for: A UPLC Q-Exactive Orbitrap Mass Spectrometry-Based Metabolomic Study of Serum and Tumor Tissue in Patients with Papillary Thyroid Cancer
Source: MDPI journal article supplement (doi:10.3390/toxics11010044), 2022-12-31
Supplement: s1 [file s1]

## Supplementary Materials

Table S1. The clinical information of patients in different groups.

|                                | TN1/PN1/SN1    | TN0/PN0/SN0     | <i>p</i> |
|--------------------------------|----------------|-----------------|----------|
| Male/female                    | 1/7            | 2/12            | 0.709    |
| Age                            | 41.625 ± 8.733 | 41.714 ± 11.159 | 0.985    |
| Body mass index                | 25.691 ± 3.027 | 24.086 ± 2.242  | 0.170    |
| Maximum diameter of tumor (cm) | 2.638 ± 0.774  | 1.857 ± 0.712   | 0.026    |

Table S2. Altered pathways in comparisons (TN1 and PN1, TN0 and PN0) by pathway analysis and enrichment analysis.

| Pathway                                         | Total | Hits | <i>p</i> | FDR   |
|-------------------------------------------------|-------|------|----------|-------|
| TN1and PN1                                      |       |      |          |       |
| Pathway analysis <sup>a</sup>                   |       |      |          |       |
| Pyrimidine metabolism                           | 39    | 4    | 0.002    | 0.012 |
| Histidine metabolism                            | 16    | 2    | 0.019    | 0.031 |
| Neomycin, kanamycin and gentamicin biosynthesis | 2     | 1    | 0.027    | 0.031 |
| Fructose and mannose metabolism                 | 20    | 2    | 0.029    | 0.031 |
| Citrate cycle (TCA cycle)                       | 20    | 2    | 0.029    | 0.031 |
| Beta-Alanine metabolism                         | 21    | 2    | 0.031    | 0.031 |
| Enrichment analysis <sup>b</sup>                |       |      |          |       |
| Fructose and Mannose Degradation                | 32    | 3    | 0.025    | 0.030 |
| Thyroid hormone synthesis                       | 13    | 2    | 0.027    | 0.030 |
| Pyrimidine Metabolism                           | 59    | 4    | 0.029    | 0.030 |
| Beta-Alanine Metabolism                         | 34    | 3    | 0.030    | 0.030 |
| TN0 and PN0                                     |       |      |          |       |
| Pathway analysis <sup>a</sup>                   |       |      |          |       |
| Citrate cycle (TCA cycle)                       | 20    | 3    | 0.000    | 0.002 |
| Glyoxylate and dicarboxylate metabolism         | 32    | 3    | 0.002    | 0.005 |
| Pyrimidine metabolism                           | 39    | 3    | 0.003    | 0.005 |
| Beta-Alanine metabolism                         | 21    | 2    | 0.011    | 0.014 |
| Tyrosine metabolism                             | 42    | 2    | 0.040    | 0.040 |
| Enrichment analysis <sup>b</sup>                |       |      |          |       |
| Citric Acid Cycle                               | 32    | 3    | 0.003    | 0.012 |
| Thyroid hormone synthesis                       | 13    | 2    | 0.006    | 0.012 |
| Pyrimidine Metabolism                           | 59    | 3    | 0.016    | 0.021 |
| Beta-Alanine Metabolism                         | 34    | 2    | 0.041    | 0.041 |

<sup>a</sup> Pathway analysis of metabolic alters based on KEGG database.

<sup>b</sup> Enrichment analysis of metabolic alters based on SMPDB.

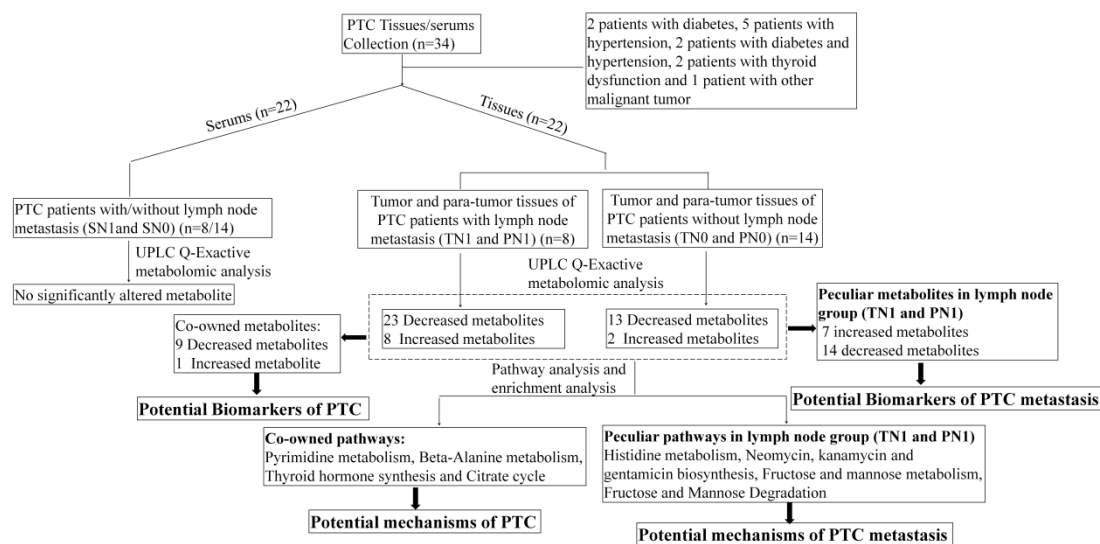

**Figure S1.** Strategy for the metabolomic study regarding PTC.
